# Supplementary material for: Monodisperse NiPd alloy nanoparticles decorated on mesoporous graphitic carbon nitride as a catalyst for the highly efficient chemoselective reduction of α,β-unsaturated ketone compounds
Source: Royal Society of Chemistry journal article supplement (doi:10.1039/d0nj03104f), 2020-01-01
Supplement: d0nj03104f1.pdf [file d0nj03104f1.pdf]

# Monodisperse NiPd Alloy Nanoparticles Decorated on Mesoporous Graphitic Carbon Nitride as Catalyst for the Highly Efficient Chemoselective Reduction of $\alpha$ , $\beta$ -Unsaturated Ketone Compounds

Çetin Bayrak,<sup>\*a,b</sup> Abdullah Menzek<sup>a</sup> and Melike Sevim<sup>\*a</sup>

<sup>a</sup> Department of Chemistry, Faculty of Science, Ataturk University, Erzurum 25240, Turkey

<sup>b</sup> Dogubayazit Ahmed-i Hani Vocational School, Agri Ibrahim Cecen University, Agri 04400, Turkey.

\* Corresponding authors. [cbayrak@agri.edu.tr](mailto:cbayrak@agri.edu.tr) and [melike.sevim@atauni.edu.tr](mailto:melike.sevim@atauni.edu.tr)

Supplementary material contains NMR spectra of synthesized compounds).

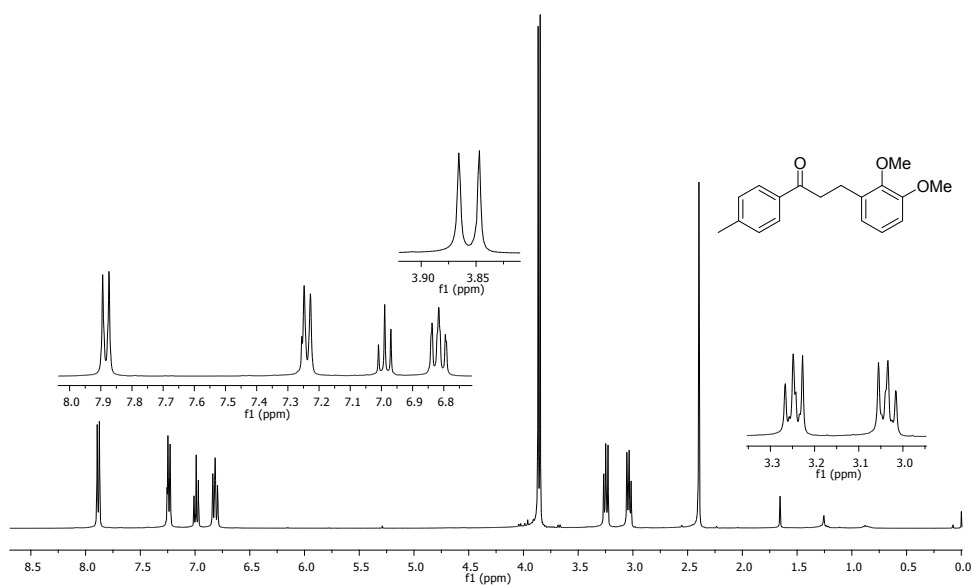

<sup>1</sup>H-NMR Spectrum of the compound **20** (400 MHz, CDCl<sub>3</sub>).

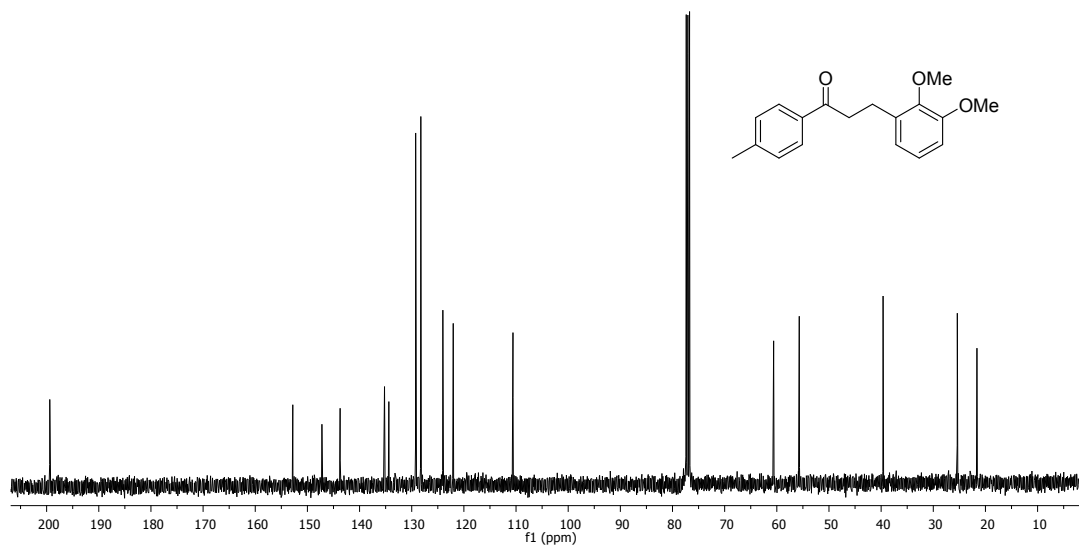

$^{13}\text{C}$ -NMR Spectrum of the compound **20** (100 MHz,  $\text{CDCl}_3$ ).

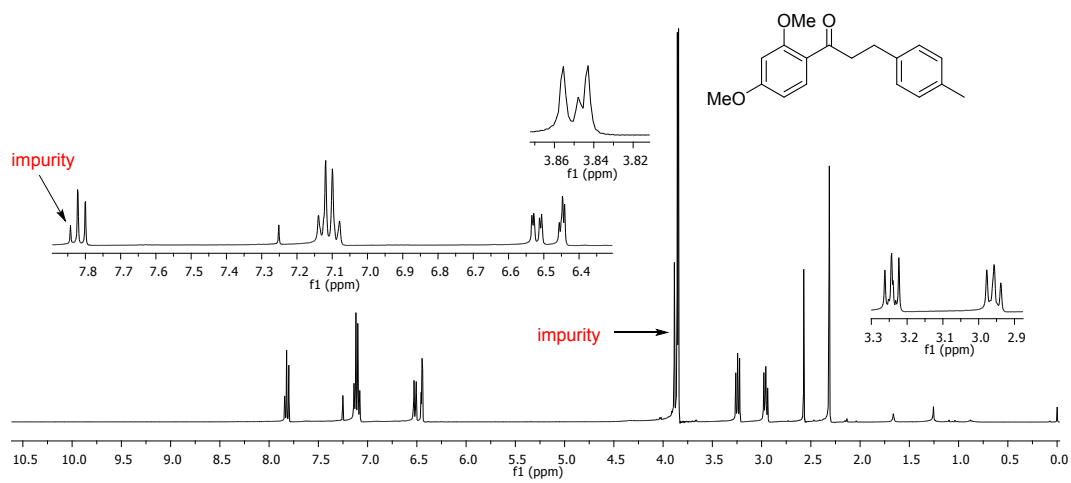

$^1\text{H}$ -NMR Spectrum of the compound **25** (400 MHz,  $\text{CDCl}_3$ ).

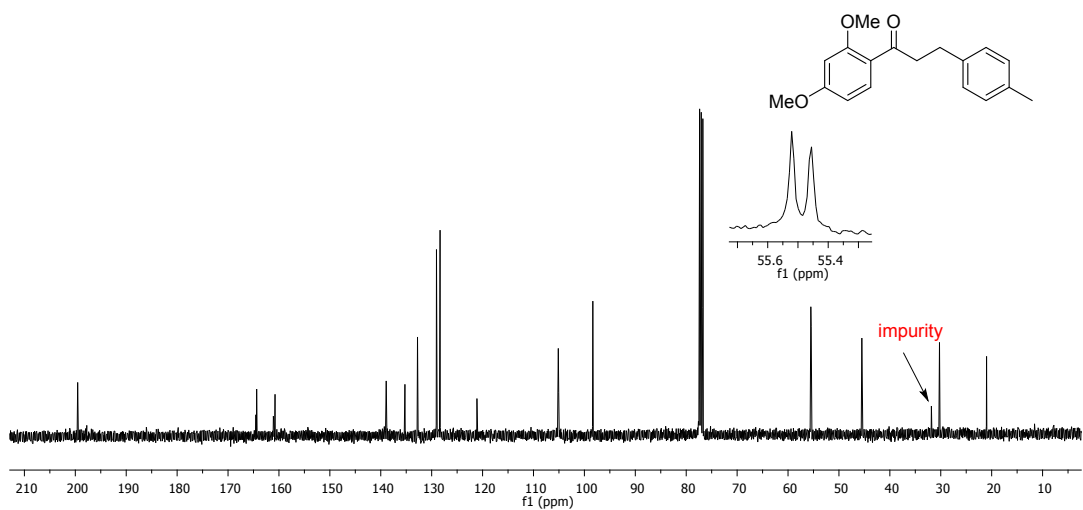

$^{13}\text{C-NMR}$  Spectrum of the compound **25** (100 MHz,  $\text{CDCl}_3$ ).

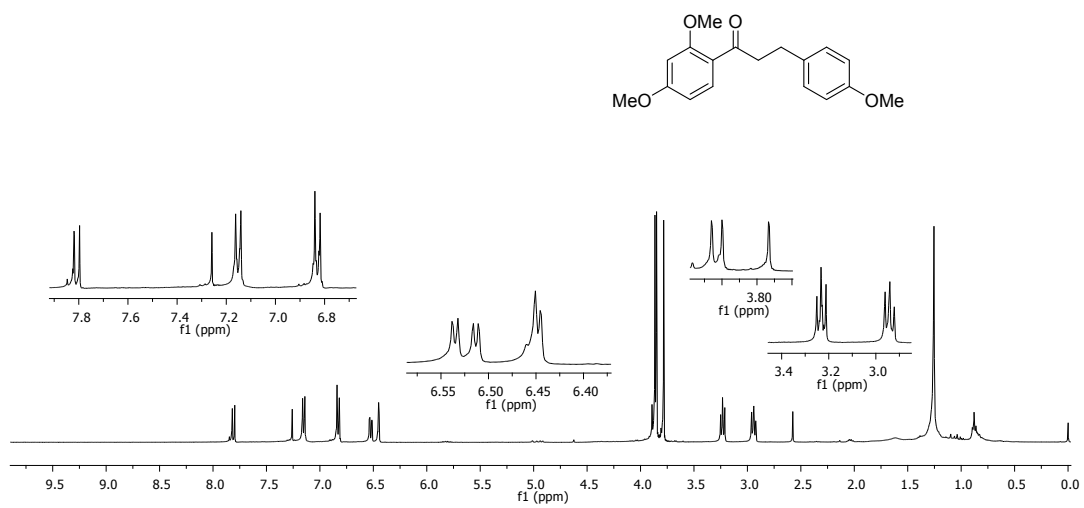

$^1\text{H-NMR}$  Spectrum of the compound **26** (400 MHz,  $\text{CDCl}_3$ ).

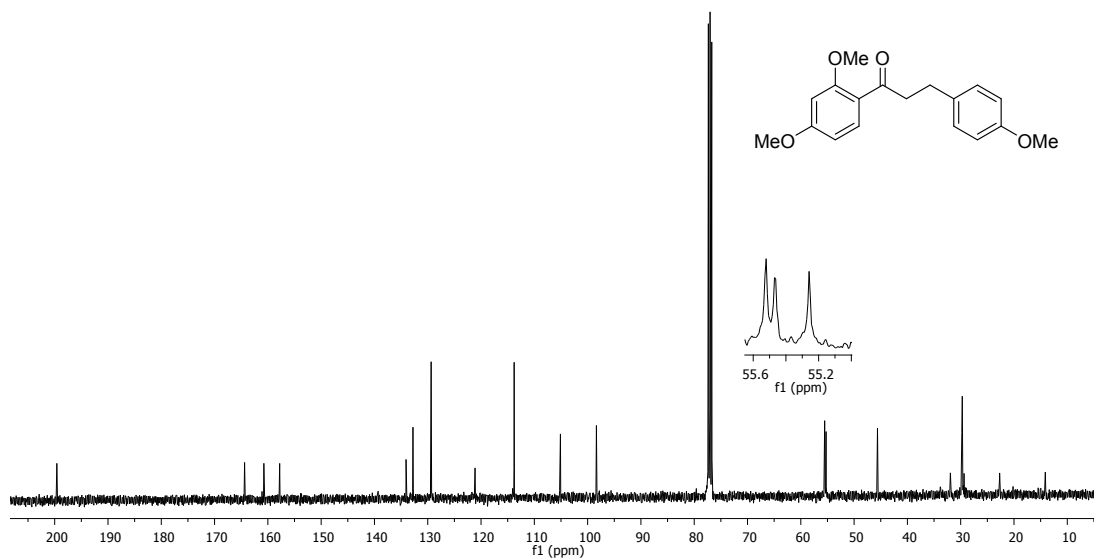

$^{13}\text{C}$ -NMR Spectrum of the compound **26** (100 MHz,  $\text{CDCl}_3$ ).

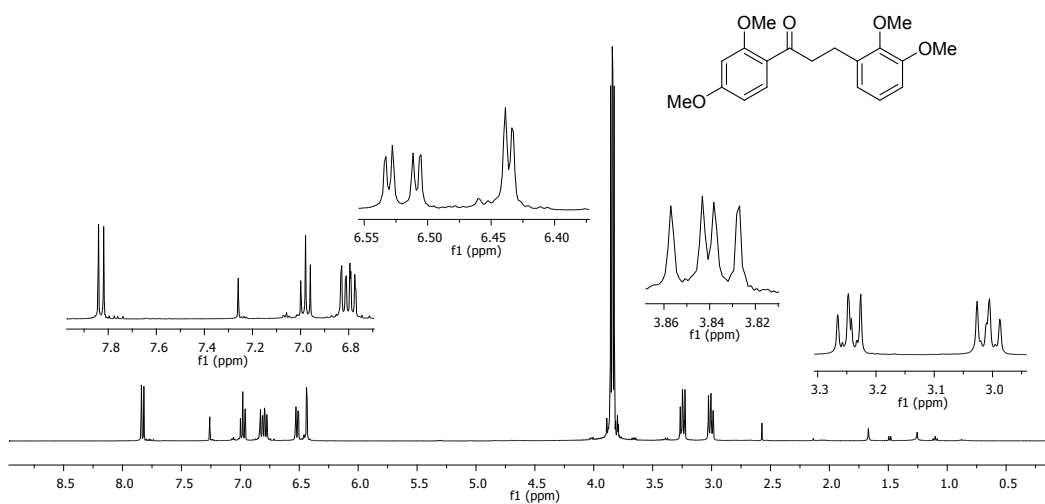

$^1\text{H}$ -NMR Spectrum of the compound **27** (400 MHz,  $\text{CDCl}_3$ ).

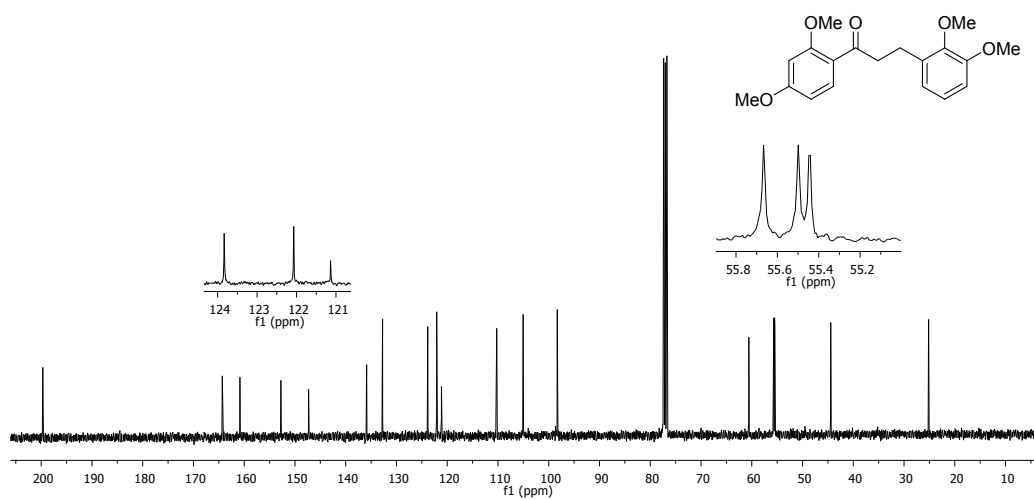

$^{13}\text{C-NMR}$  Spectrum of the compound **27** (100 MHz,  $\text{CDCl}_3$ ).

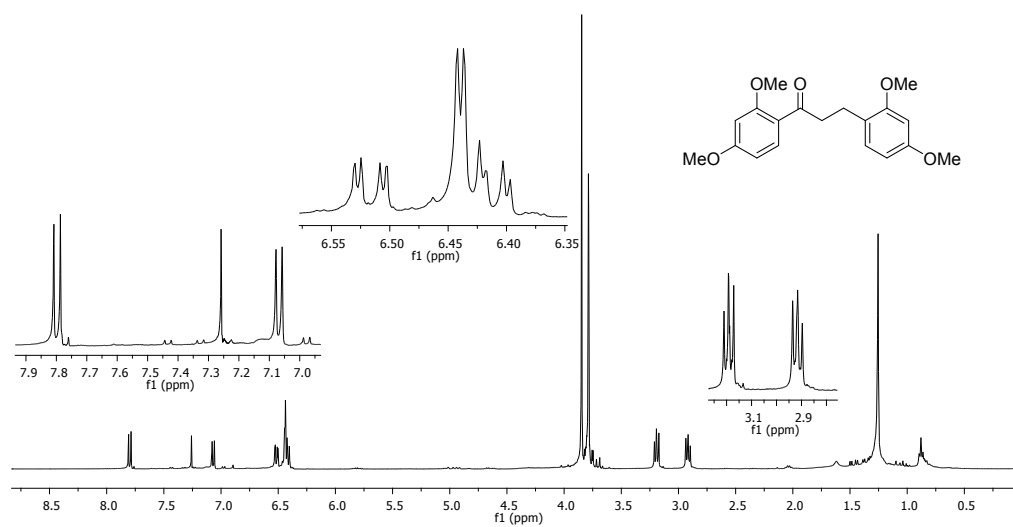

$^1\text{H-NMR}$  Spectrum of the compound **28** (400 MHz,  $\text{CDCl}_3$ ).

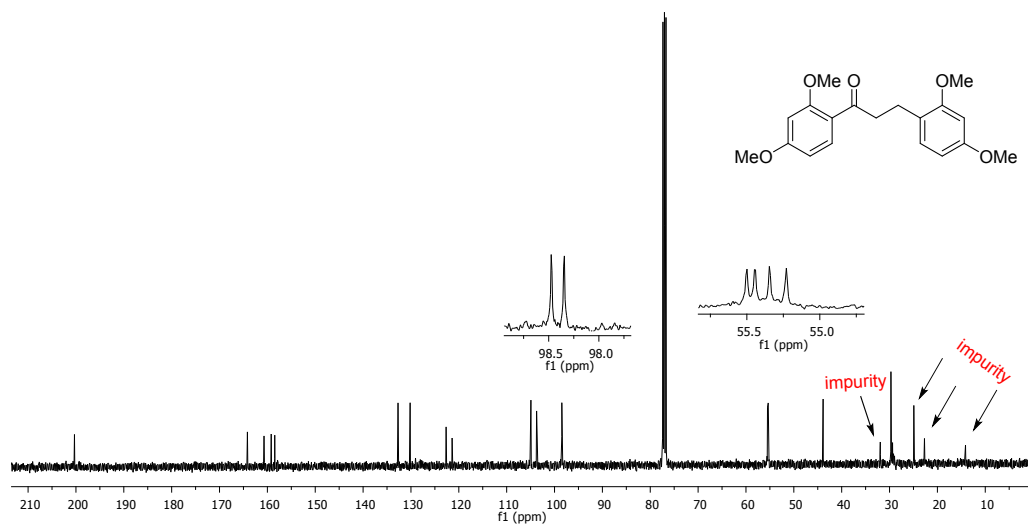

$^{13}\text{C-NMR}$  Spectrum of the compound **28** (100 MHz,  $\text{CDCl}_3$ ).

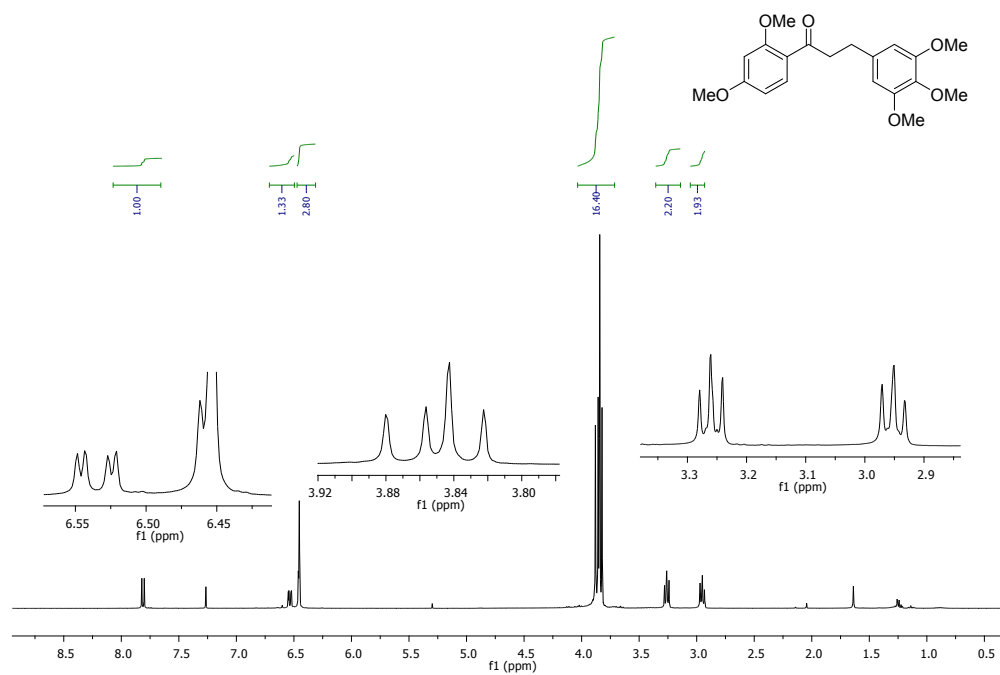

$^1\text{H-NMR}$  Spectrum of the compound **29** (400 MHz,  $\text{CDCl}_3$ ).

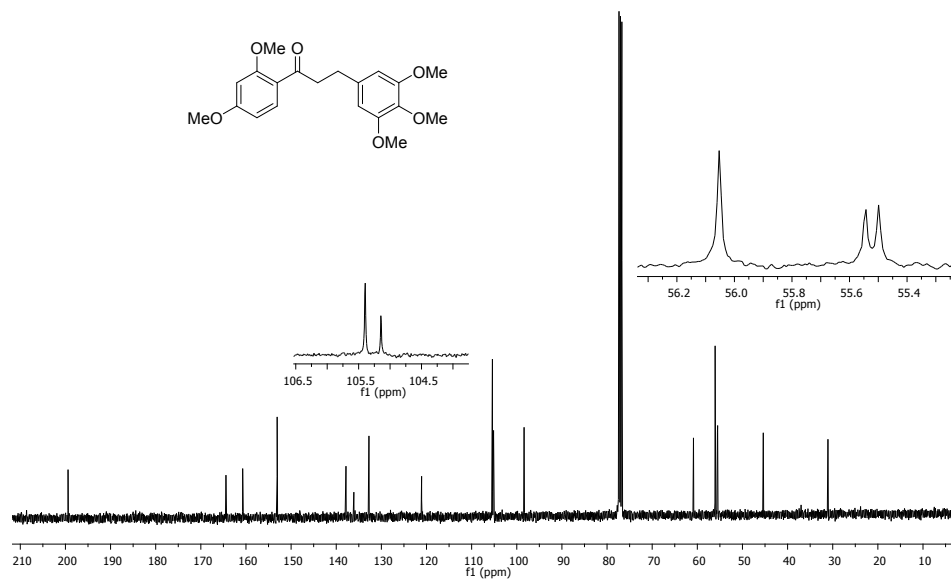

$^{13}\text{C}$ -NMR Spectrum of the compound **29** (100 MHz,  $\text{CDCl}_3$ ).
